# Supplementary material
Source: PubMed Central journal article supplement (PMC3756807)
Supplement: NIHMS482633-supplement-supplement_1.pdf [file NIHMS482633-supplement-supplement_1.pdf]

Online Resource 1- Prevalence of Cardiovascular Disease Risk Factors for Long-term Cancer Survivors by Race/Ethnicity and Cancer Type

|                            | Race/Ethnicity |                   |                                |                            |                              |                                   | $\chi^2$ ,<br>p-value |
|----------------------------|----------------|-------------------|--------------------------------|----------------------------|------------------------------|-----------------------------------|-----------------------|
|                            | Total          |                   | Non-Hispanic,<br>White (n=580) | Hispanic, White<br>(n=207) | African-American<br>(n= 368) | Asian/Pacific Islander<br>(n=348) |                       |
|                            | N              | Wt% (95% CI)      | Wt% (95% CI)                   | Wt% (95% CI)               | Wt% (95% CI)                 | Wt% (95% CI)                      |                       |
| <b>BMI</b>                 |                |                   |                                |                            |                              |                                   |                       |
| <25                        | 599            | 38.0 (34.3, 41.8) | 40.8 (35.1, 46.8)              | 26.8 (19.7, 35.5)          | 23.5 (16.6, 32.1)            | 60.7 (53.5, 67.5)                 | 9.99,<br>p<.0001      |
| 25-<30                     | 520            | 38.0 (34.3, 41.9) | 36.9 (31.3, 42.8)              | 44.0 (35.2, 53.2)          | 44.9 (36.1, 54.0)            | 25.7 (20.4, 31.8)                 |                       |
| 30+                        | 384            | 24.0 (20.8, 27.5) | 22.3 (17.8, 27.7)              | 29.2 (21.4, 38.4)          | 31.6 (24.4, 39.8)            | 13.6 (9.1, 19.9)                  |                       |
| <b>Physical Inactivity</b> |                |                   |                                |                            |                              |                                   |                       |
| Meets Guideline            | 606            | 44.0 (40.3, 47.8) | 43.7 (38.1, 49.6)              | 47.4 (38.4, 56.5)          | 45.8 (37.8, 54.1)            | 38.5 (32.2, 45.2)                 | 2.62,<br>p=.02        |
| Some Activity              | 589            | 37.9 (34.2, 41.6) | 42.0 (36.4, 47.9)              | 31.4 (23.6, 40.6)          | 30.0 (23.1, 38.0)            | 40.6 (33.5, 48.1)                 |                       |
| No Activity                | 324            | 18.1 (15.6, 20.9) | 14.2 (10.7, 18.7)              | 21.2 (14.7, 29.5)          | 24.2 (18.9, 30.3)            | 20.9 (15.4, 27.8)                 |                       |
| <b>Smoking Status</b>      |                |                   |                                |                            |                              |                                   |                       |
| Never smoked               | 811            | 54.7 (50.8, 58.5) | 55.6 (49.8, 61.3)              | 54.8 (45.5, 63.8)          | 40.8 (32.1, 50.0)            | 69.1 (62.5, 75.1)                 | 4.75,<br>p<.0001      |
| Former smoker              | 573            | 40.2 (36.5, 44.0) | 40.0 (34.5, 45.7)              | 41.8 (33.1, 51.1)          | 49.8 (40.6, 59.0)            | 26.8 (21.1, 33.3)                 |                       |
| Current smoker             | 91             | 5.1 (3.8, 6.9)    | 4.4 (2.8, 6.8)                 | 3.4 (1.3, 8.4)             | 9.5 (5.3, 16.3)              | 4.1 (1.9, 8.5)                    |                       |
| <b>Hypertension</b>        |                |                   |                                |                            |                              |                                   |                       |
| No                         | 637            | 45.0 (41.1, 48.9) | 52.1 (46.2, 57.9)              | 43.6 (34.6, 53.1)          | 30.4 (22.7, 39.4)            | 39.5 (33.2, 46.2)                 | 6.14,<br>P<0.0004     |
| Yes                        | 877            | 55.0 (51.1, 58.9) | 47.9 (42.1, 53.8)              | 56.4 (46.9, 65.4)          | 69.6 (60.6, 77.3)            | 60.5 (53.8, 66.8)                 |                       |
| <b>Diabetes</b>            |                |                   |                                |                            |                              |                                   |                       |
| No                         | 1161           | 79.3 (76.0, 82.2) | 86.0 (81.4, 89.6)              | 70.4 (60.9, 78.4)          | 72.9 (64.4, 80.0)            | 73.1 (66.4, 78.9)                 | 6.80,<br>p=0.0001     |
| Yes                        | 364            | 20.7 (17.8, 24.0) | 14.0 (10.4, 18.6)              | 29.6 (21.6, 39.1)          | 27.1 (20.0, 35.6)            | 26.9 (21.1, 33.6)                 |                       |

Physical activity was classified as meeting American College of Sports Medicine/ American Heart Association’s physical activity guidelines for adults[18] ( $\geq$  150 minutes of moderate-intensity or 60 minutes of vigorous-intensity physical activity per week), some moderate or vigorous physical activity, but below guideline level, or those reporting no moderate and no vigorous activity in the past 4 weeks. Self-report of ever diagnosis with hypertension or diabetes defined these risk factors. The number of observations listed for each race/ethnicity group is for BMI; the number of observations for other risk factors was very similar.

|                            | <b>Cancer Type</b>                     |                                          |                                            |                                             | <b>X<sup>2</sup>,<br/>p-value</b> |
|----------------------------|----------------------------------------|------------------------------------------|--------------------------------------------|---------------------------------------------|-----------------------------------|
|                            | <b>Breast (n= 376)</b><br>Wt% (95% CI) | <b>Prostate (n= 382)</b><br>Wt% (95% CI) | <b>Colorectal (n= 382)</b><br>Wt% (95% CI) | <b>Gynecologic (n= 391)</b><br>Wt% (95% CI) |                                   |
| <b>BMI</b>                 |                                        |                                          |                                            |                                             |                                   |
| <25                        | 42.7 (35.8, 49.9)                      | 30.4 (24.1, 37.6)                        | 42.6 (35.7, 49.8)                          | 40.9 (33.1, 49.2)                           | 6.15, p<.001                      |
| 25-<30                     | 32.8 (26.5, 39.9)                      | 51.1 (43.7, 58.5)                        | 33.3 (26.8, 40.5)                          | 22.4 (17.1, 28.6)                           |                                   |
| 30+                        | 24.5 (18.9, 31.1)                      | 18.5 (13.4, 24.9)                        | 24.1 (18.0, 31.4)                          | 36.7 (28.9, 45.2)                           |                                   |
| <b>Physical Inactivity</b> |                                        |                                          |                                            |                                             |                                   |
| Meets Guidelines           | 37.1 (30.5, 44.3)                      | 54.2 (47.1, 61.1)                        | 41.9 (34.7, 49.4)                          | 31.3 (25.0, 38.4)                           | 4.92, p<.001                      |
| Some Activity              | 44.1 (37.1, 51.3)                      | 32.4 (26.2, 39.4)                        | 41.7 (34.3, 49.5)                          | 37.4 (30.2, 45.2)                           |                                   |
| No Activity                | 18.8 (14.0, 24.8)                      | 13.4 (9.6, 18.4)                         | 16.5 (12.2, 21.8)                          | 31.3 (24.4, 39.2)                           |                                   |
| <b>Smoking Status</b>      |                                        |                                          |                                            |                                             |                                   |
| Never smoked               | 65.8 (58.6, 72.3)                      | 49.2 (41.7, 56.6)                        | 41.9 (34.9, 49.3)                          | 67.0 (59.9, 73.4)                           | 7.66, p<.001                      |
| Former smoker              | 27.2 (21.3, 34.1)                      | 46.6 (39.2, 54.2)                        | 54.2 (46.9, 61.3)                          | 27.1 (21.0, 34.2)                           |                                   |
| Current smoker             | 7.0 (4.0, 11.9)                        | 4.3 (2.3, 7.9)                           | 3.9 (2.3, 6.3)                             | 5.9 (3.2, 10.5)                             |                                   |
| <b>Hypertension</b>        |                                        |                                          |                                            |                                             |                                   |
| No                         | 54.8 (48.0, 61.4)                      | 43.2 (35.9, 50.7)                        | 38.1 (31.2, 45.5)                          | 46.6 (38.7, 54.6)                           | 3.96, p=0.008                     |
| Yes                        | 45.2 (38.6, 52.0)                      | 56.8 (49.3, 64.1)                        | 61.9 (54.5, 68.8)                          | 53.4 (45.4, 61.3)                           |                                   |
| <b>Diabetes</b>            |                                        |                                          |                                            |                                             |                                   |
| No                         | 81.1 (75.1, 86.0)                      | 77.2 (70.7, 82.6)                        | 79.7 (73.7, 84.7)                          | 79.4 (72.5, 85.0)                           | 0.32, p=0.81                      |
| Yes                        | 18.9 (14.0, 24.9)                      | 22.8 (17.4, 29.3)                        | 20.3 (15.3, 26.3)                          | 20.6 (15.0, 27.5)                           |                                   |

Physical activity was classified as meeting American College of Sports Medicine/ American Heart Association's physical activity guidelines for adults[18] ( $\geq$  150 minutes of moderate-intensity or 60 minutes of vigorous-intensity physical activity per week), some moderate or vigorous physical activity, but below guideline level, or those reporting no moderate and no vigorous activity in the past 4 weeks. Self-report of ever diagnosis with hypertension or diabetes defined these risk factors. The number of observations listed for each cancer type is for BMI; the number of observations for other risk factors was very similar.
